# Supplementary material
Source: Copernicus journal article supplement (doi:10.5194/jm-45-429-2026)
Supplement: Supplementary file [file jm-45-429-2026-supplement-title-page.pdf › jm-45-429-2026-supplement-title-page.pdf]

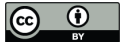

*Supplement of*

**Ontogenetic growth of three cultured species of *Heterocypris* Claus, 1892 (Crustacea: Ostracoda): eggs and valve morphology**

**Mauricio Bonilla-Flores et al.**

*Correspondence to:* Mauricio Bonilla-Flores (bfmau\_chili@hotmail.com)

- jm-45-429-2026-supplement-title-page.pdf
- Supplementary material 1.xlsx

The copyright of individual parts of the supplement might differ from the article licence.
